# Histone recognition and nuclear receptor co-activator functions of *Drosophila* Cara Mitad, a homolog of the N-terminal portion of mammalian MLL2 and MLL3

Chhavi Chauhan<sup>1,\*</sup>, Claudia B. Zraly<sup>1,\*‡</sup>, Megan Parilla<sup>1</sup>, Manuel O. Diaz<sup>1,2</sup> and Andrew K. Dingwall<sup>1,3,‡</sup>

## SUMMARY

MLL2 and MLL3 histone lysine methyltransferases are conserved components of COMPASS-like co-activator complexes. In vertebrates, the paralogous MLL2 and MLL3 contain multiple domains required for epigenetic reading and writing of the histone code involved in hormone-stimulated gene programming, including receptor-binding motifs, SET methyltransferase, HMG and PHD domains. The genes encoding MLL2 and MLL3 arose from a common ancestor. Phylogenetic analyses reveal that the ancestral gene underwent a fission event in some Brachycera diptera, including *Drosophila* species, creating two independent genes corresponding to the N- and C-terminal portions. In *Drosophila*, the C-terminal SET domain is encoded by *trithorax-related* (*trr*), which is required for hormone-dependent gene activation. We identified the *cara mitad* (*cmi*) gene, which encodes the previously undiscovered N-terminal region consisting of PHD and HMG domains and receptor-binding motifs. The *cmi* gene is essential and its functions are dosage sensitive. CMI associates with TRR, as well as the EcR-USP receptor, and is required for hormone-dependent transcription. Unexpectedly, although the CMI and MLL2 PHDf3 domains could bind histone H3, neither showed preference for trimethylated lysine 4. Genetic tests reveal that *cmi* is required for proper global trimethylation of H3K4 and that hormone-stimulated transcription requires chromatin binding by CMI, methylation of H3K4 by TRR and demethylation of H3K27 by the demethylase UTX. The evolutionary split of MLL2 into two distinct genes in *Drosophila* provides important insight into distinct epigenetic functions of conserved readers and writers of the histone code.

**KEY WORDS:** *Drosophila*, Co-activator, Histone, Hormone, Patterning

## INTRODUCTION

Nuclear receptors (NRs) function as transcription factors that respond to cellular signals to initiate new gene expression programs (King-Jones and Thummel, 2005) and have essential roles in embryonic development, growth and differentiation. NRs collaborate with co-factors (>300) that provide important enzymatic and regulatory functions (Lonard and O'Malley, 2007; Lonard and O'Malley, 2006). Co-factors can be activators or repressors and are typically recruited to gene promoters through associations with receptors (Bulyanko and O'Malley, 2011). Some co-factors direct changes in the epigenetic environment of target genes by direct covalent chromatin modification or nucleosome remodeling. Co-activators are recruited in a ligand-dependent manner, whereas unliganded receptors often associate with co-repressors. Co-activators exist in large complexes required for the transcription of genes that are regulated by at least 48 vertebrate NRs, including retinoic acid receptor (RAR) (Goo et al., 2003; Lee et al., 2006), estrogen receptor (ER) (Mo et al., 2006), liver-X-receptor (LXR) (Lee, S. et al., 2008), farnesoid-X-receptor (FXR) (Kim et al., 2009), as well as a co-activator for p53 (Lee et al., 2009). Disruptions of both NRs and their co-regulators have been linked to many cancers and developmental disorders (Lonard et al., 2007; Sonoda et al., 2008).

Hormone signaling pathways in *Drosophila melanogaster* rely on two primary hormones, the steroid hormone 20-hydroxyecdysone (20HE) and sesquiterpenoid juvenile hormone (JH; JHE – FlyBase), and 18 receptors representing all major conserved nuclear receptor subfamilies (King-Jones and Thummel, 2005). *Drosophila* Ecdysone Receptor (EcR) is an FXR/LXR ortholog, whereas its heterodimeric partner Ultraspiracle (USP) is an RXR ortholog.

*Drosophila* Trithorax-related (TRR) is a co-activator of EcR-USP. TRR is a histone lysine methyltransferase (HMT) that trimethylates histone 3 onlysine 4 (H3K4me3) and TRR functions are essential for activating ecdysone-regulated genes (Sedkov et al., 2003). TRR is closely related to another *Drosophila* protein, Trithorax (TRX), which regulates homeotic (Hox) gene expression through similar methyltransferase activity (Schuettengruber et al., 2007; Simon and Tamkun, 2002). The mammalian counterparts of TRR are MLL2 (also known as ALR or MLL4) and MLL3 (also known as HALR). MLL2 and MLL3 are enormous (5537 aa and 4911 aa, respectively), with multiple conserved domains, including histone methyltransferase (SET domain), five plant homeodomain (PHD) zinc fingers, an HMG-I binding motif, LXXLL NR binding motifs and FY-rich regions (Prasad et al., 1997). Through the SET domain, both MLL2 and MLL3 directly methylate histone H3 to mediate transcription activation (Issaeva et al., 2007; Vicent et al., 2011).

MLL2 and MLL3 are components of large SET1/COMPASS-like co-activator complexes (Eissenberg and Shilatifard, 2010; Miller et al., 2001; Nagy et al., 2002) that are required for NR-directed gene regulation (Goo et al., 2003; Issaeva et al., 2007; Lee et al., 2006; Mo et al., 2006). These complexes have important human disease connections, including developmental disorders and cancers. *MLL2*

<sup>1</sup>Oncology Institute, <sup>2</sup>Department of Medicine, <sup>3</sup>Department of Pathology, Stritch School of Medicine, Loyola University of Chicago, Maywood, IL 60153, USA.

\*These authors contributed equally to this work

‡Authors for correspondence (czraly@lumc.edu; adingwall@lumc.edu)

and *MLL3* are mutated in many Kabuki syndrome patients (Ng et al., 2010; Paulussen et al., 2011). *MLL2* is frequently mutated in childhood medulloblastomas (14%) (Parsons et al., 2011), follicular lymphoma (89%) and diffuse large B-cell lymphoma (32%) (the two most common forms of non-Hodgkin lymphoma) (Morin et al., 2011), suggesting that *MLL2* and *MLL3* COMPASS-like complex activities have important epigenetic gene regulatory roles that normally function to inhibit cancer progression.

Proteins that co-purify with the *MLL2* include *ASH2*, *RBBP5* (*RBQ3*), *DPY30*, *WDR5*, adaptor protein *ASC2*, *PTIP*, *PA1* and histone demethylase *UTX* (Cho et al., 2007; Issaeva et al., 2007; Lee, S. et al., 2008; Mo et al., 2006). Recently, *TRR* was found in *Drosophila* COMPASS-like complexes (Mohan et al., 2011). Despite functional similarities, *TRR* is much smaller than *MLL2* or *MLL3* with homology limited to the C-terminal SET domain portion (Sedkov et al., 2003). *TRR* lacks the N-terminal PHD and HMG domains that might contribute to chromatin binding. *MLL2*-related family members are always encoded by large single genes in species other than Brachycera dipterans (A.K.D. and M.O.D., unpublished). To further our studies on epigenetic regulation of ecdysone target genes (Zrally et al., 2006), we searched for *Drosophila* genes that could encode a protein highly related to the N-terminal half of *MLL2* and identified a single open reading frame (*CG5591*). We named the gene *cara mitad* (*cmi*; translated as ‘dear half’). Although *cmi* is unlinked to *trr* in the genome, our genetic studies using null mutants, in vivo depletion and overexpression revealed functions for *cmi* as a nuclear receptor co-factor necessary for hormone-regulated gene expression. Unexpectedly, the CMI type 3 PHD finger (PHDf3) (Chang et al., 2010; Park et al., 2010; Wang et al., 2010) was found to accommodate non-methylated, mono- and dimethylated H3K4, rather than trimethylated H3K4. Moreover, CMI-dependent activation also required demethylation functions of *UTX*, suggesting that NR-stimulated transcription involved at least three steps: binding of H3K4me1/2 by CMI, trimethylation of H3K4 by *TRR* and demethylation of H3K27 by *UTX*. The intriguing possibility that COMPASS-like functions in NR-directed transcription are associated with two independent proteins in flies suggests that recognition and binding to modified histones is a distinct step, separate from the epigenetic modification associated with other enzymes in the complex. This presents a unique opportunity to examine functions of histone recognition/binding and covalent histone tail lysine modifications as separate and essential features of NR-directed activation.

## MATERIALS AND METHODS

### Fly strains and genetic manipulations

Genetic crosses were performed on yeast-cornmeal-glucose medium at 25°C. Mutations in *cmi* (*CG5591*) were generated by  $\Delta$ 2-3 transposase-mediated excision of a *P*-element (*[EPgy2]EY06424*) residing ~380bp 5' to the *cmi* transcript initiation site. Lethal phase analysis of *cmi* mutants was carried out as described (Zrally et al., 2002). Expression of epitope-tagged *HA-cmi* and short hairpin RNAi constructs (*cmi-IR*) was carried out by crosses with *GAL4* driver strains at 18°C, 25°C or 29°C as indicated (Dietzl et al., 2007; Lam and Thummel, 2000). shRNAi transgenic lines were obtained from *Drosophila* stock centers (Bloomington *Drosophila* Stock Center, Vienna *Drosophila* RNAi Center and National Institute of Genetics Fly Resource Center).

### CMI antibodies, GST pulldowns and co-immunoprecipitation

A peptide corresponding to CMI amino acids (aa) 749-762 was used to generate rabbit polyclonal antiserum (GenScript, Piscataway, NJ, USA). Preparation of embryo extracts and western analysis were performed using standard protocols (Zrally et al., 2003). Portions of CMI (*XN*, aa 647-1482;

*XS*, aa 647-1071) and *MLL2* (aa 1503-1560) were fused to GST in pGEX4T (Amersham/GE Healthcare, Piscataway, NJ, USA). Glutathione-S-transferase (GST) fusion proteins and control GST (C) were bound to agarose resin in equivalent amounts as assessed by Coomassie Blue gel staining. GST-pulldown assays were performed as described (Zrally et al., 2004). Wild-type *Drosophila OregonR* embryo extracts (500  $\mu$ g) were treated with  $10^{-6}$  M 20HE for 1 hour at 4°C prior to incubation with immobilized GST proteins. Beads were washed extensively and bound proteins detected by immunoblot using antibodies to EcR (Talbot et al., 1993), USP (Christianson et al., 1992) and TRR (Sedkov et al., 2003). Input lanes represent 20% (100  $\mu$ g) of starting material. Extracts prepared from whole embryos or staged larvae/pupae containing *P[GawB]69B-GAL4;UAS<sub>GAL4</sub>-HA-cmi* were immunoprecipitated with anti-HA antibodies (Abcam) (Brumby et al., 2002; Dingwall et al., 1995; Zrally et al., 2004). Extracts were pre-incubated with 20HE prior to co-immunoprecipitation.

### EcRE-lacZ assays

Transgenic flies carrying a *7xEcRE* (Ecdysone Response Element) derived from the *Hsp27* gene linked to a *lacZ* reporter (Koelle et al., 1991; Kozlova and Thummel, 2003; Talbot et al., 1993) were used to monitor CMI transactivation functions, either by immunoblot with monoclonal antibodies to  $\beta$ -galactosidase or by quantitative CPRG assays (Seroude et al., 2002; Simon and Lis, 1987).

### Chromatin immunoprecipitation (ChIP)

Whole-animal extracts prepared from early pupae expressing HA-CMI were used for chromatin immunoprecipitation assays according to manufacturer's protocols (Millipore, Temecula, CA, USA), with rabbit anti-HA and anti-IgG (Abcam). qPCR reactions were carried out in triplicate. Fold enrichment was measured against IgG negative control and values normalized to ChIP input.

### Histone analysis and peptide pulldown assays

Bulk cellular histones were purified from *Drosophila* S2 cells and staged pupae according to manufacturer's protocols (Active Motif, Carlsbad, CA, USA). Western blots were performed using antibodies detecting modified or bulk histones. Band intensities were determined using ImageJ (NIH) analysis software, with H3K4me3 level values reflective of comparison to ‘*GAL4* driver alone’ control (*P[GawB]69B*) after normalizing to total H3 level for each sample.

Purified GST-PHDf3b fusions (2  $\mu$ g) were incubated with 1  $\mu$ g biotinylated histone peptides (Millipore) in binding buffer (50 mM Tris-HCl pH 7.5, 150 mM or 300 mM NaCl, 0.1% NP40) overnight at 4°C. After a 1 hour incubation with streptavidin beads (Pierce), immobilized complexes were collected by centrifugation, washed extensively with binding buffer, resuspended in 2 $\times$  Laemmli sample buffer (BioRad, Hercules, CA, USA), boiled and loaded onto 12% SDS-PAGE gels. Western analysis was performed using antibody to GST (Abcam). GST-PHDf3 fusions without histone peptides served as negative controls.

### RNA analysis

Total RNA from 100 L2 larvae (~0-8 hours prior to L3 molt) of each genotype was prepared using the RNAqueous extraction system (Applied Biosystems, Foster City, CA, USA) and analyzed by semi-quantitative RT-PCR with HotStar Taq DNA polymerase (Qiagen, Valencia, CA, USA) using annealing temperatures appropriate for each primer pair. SYBR Green quantitative real-time PCR on reverse transcriptase reactions (qRT-PCR) was performed in triplicate using GoTaq qPCR Master mix (Promega). Levels of mRNA were analyzed using the comparative Ct method. qRT-PCR primers were used that spanned at least one intron when appropriate corresponding to *usp*, *E75B* (*Eip75B* – FlyBase), the *EcR* common region and specific *E74* (*Eip74EF* – FlyBase) isoforms. The ribosomal protein gene *rp49* (*RpL32* – FlyBase) was used as a reference standard.

### Analysis of circulating hemocytes

Wandering L3 larvae were washed in water, dried briefly and punctured in mid-abdomen to remove circulating hemocytes ( $\leq 1$   $\mu$ l). Hemolymph from five larvae of each genotype was suspended in 10  $\mu$ l PBS, air-dried on

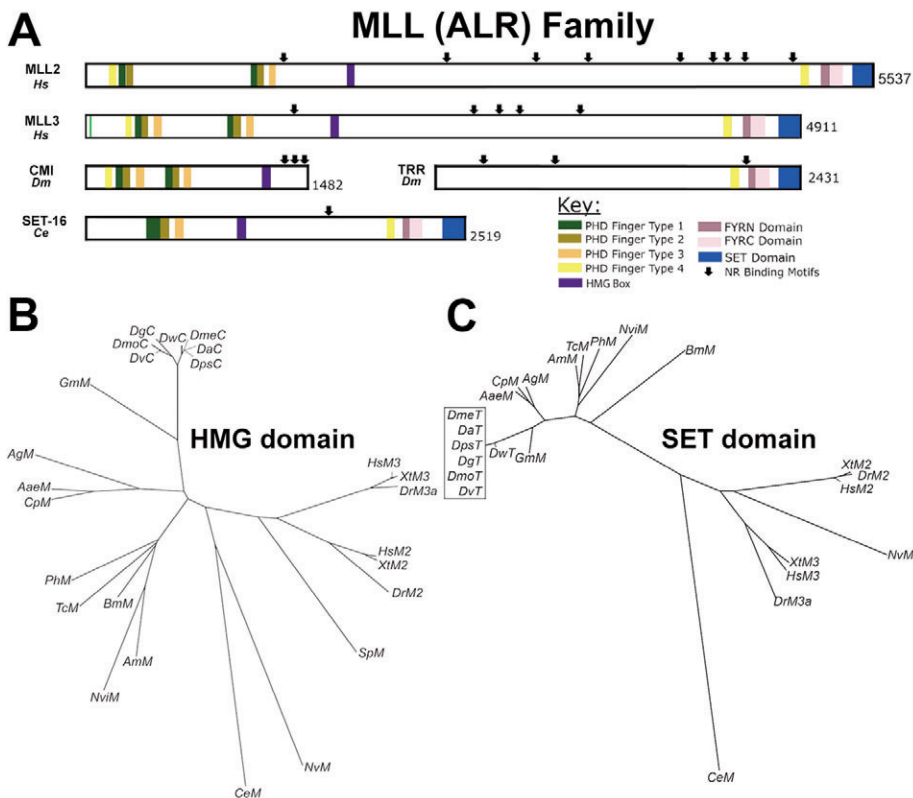

**Fig. 1. *Drosophila* CMI is a member of the MLL family of histone-modifying enzymes.**

(A) Schematic of MLL family domain structures from human (MLL2: AF010403, HGNC 7133; MLL3: AF264750, HGNC 13726), *Drosophila* (CMI/CG5591: AAF47094; TRR/CG3848=AAF45684) and *Caenorhabditis* (SET-16/T12D8.1: NP499819). (B, C) Dendrograms depicting hierarchical clustering of similar deduced functional domains from the MLL family HMG (B) and SET (C) domains. Aa, *Aedes aegypti* (mosquito); Ag, *Anopheles gambiae* (mosquito); Am, *Apis mellifera* (honey bee); Bm, *Bombyx mori* (silkworm); Ce, *Caenorhabditis elegans* (worm); Cp, *Culex pipiens* (mosquito); Da, *Drosophila ananassae* (fruitfly); Dg, *Drosophila grimshawi* (fruitfly); Dm, *Drosophila melanogaster* (fruitfly); Dmo, *Drosophila mojavensis* (fruitfly); Dps, *Drosophila pseudoobscura* (fruitfly); Dr, *Danio rerio* (zebrafish); Dw, *Drosophila virilis* (fruitfly); Gm, *Glossina morsitans* (tse-tse fly); Hs, *Homo sapiens* (human); Nv, *Nematostella vectensis* (sea anemone); Nvi, *Nasonia vitripennis* (parasitic wasp); Ph, *Pediculus humanus* (head louse); Sp, *Strongylocentrotus purpuratus* (sea urchin); Tc, *Tribolium castaneum* (beetle); XI, *Xenopus laevis* (clawed frog). T, TRR; C, CMI; M, MLL.

poly-lysine coated slides and fixed for 15 minutes in 4% formaldehyde in PBS, rinsed in PBS, then mounted in aquamount with DAPI. Circulating hemocyte counts were obtained from at least five independent measurements at each larval stage (ten fields counted and averaged) to obtain average cell counts per field. Experiments were repeated at least three times.

## RESULTS

### *Drosophila* CMI is the counterpart to the N-terminus of the MLL family of nuclear receptor co-activators

Key structural features of the vertebrate MLL co-activator family (Fig. 1) include a histone methyltransferase (SET) domain responsible for methylation of H3K4, PHD fingers thought to recognize and bind histone tails, NR binding motifs, FY-rich regions and an HMG domain (implicated in DNA binding) (Eissenberg and Shilatifard, 2010). *Drosophila* TRR is related to the carboxyl-terminal region of MLL2 and MLL3 and is required for hormone-dependent gene expression (Sedkov et al., 2003). Because TRR lacks the N-terminal PHD and HMG domains that might contribute to chromatin binding, we searched for *Drosophila* genes that might encode these features and identified a single homolog, CG5591, which we named *cmi* (*cara mitad*; Flybase FBgn0259119). The *cmi* gene potentially encodes for a 163 kDa protein with similar structure to the N-terminus of the MLL family proteins, including two PHD clusters, an HMG domain and three potential NR-binding sequences (Fig. 1A). CMI appears to be equally related to MLL2 and MLL3, suggesting a common ancestral origin. MLL-related homologs exist in the nematode *Caenorhabditis elegans*, primitive metazoan *Nematostella vectensis* and *Tribolium castaneum*, an insect of the order Coleoptera; however, these appear to be single proteins, implying that CMI and TRR split during the evolution of insects. The *cmi* gene resides on

the second chromosome at 60A9, whereas *trr* is on the X chromosome at 2B14, suggesting a progenitor fission event. Cluster analysis based on the conserved HMG domain reveals potentially important common functions among the MLL family of transcription activators, perhaps in gene regulation through chromatin binding (Fig. 1B). SET domain cluster analysis also indicates strong evolutionary conservation (Fig. 1C).

Similar to *trr*, the *cmi* (CG5591) transcript is widely expressed with strong maternal contribution and uniform zygotic expression. Transcription of *cmi* increases during the early pupal stage, coincident with rising ecdysone hormone titers and the onset of metamorphosis (supplementary material Fig. S1). We found by immunostaining that CMI protein is broadly distributed in embryos and larval imaginal disc tissues (our unpublished observations).

### The *cmi* gene is essential for normal development

We sought to determine whether *cmi* function was essential by generating null alleles and in vivo RNAi (Fig. 2). First, transposase-mediated excision of a closely linked *P*-element produced two mutant alleles of *cmi* (*cmi*<sup>1</sup> and *cmi*<sup>2</sup>). The *P*[EPgy-2]EY06424 insertion is viable whereas the excision mutants are lethal as homozygotes and in combination with a large chromosomal deletion (*Df*[2R]or-BR11) that removes *cmi*. Both *cmi* mutations were sequenced and found to result in deletion of the *cmi* promoter and portions of the CMI open reading frame (Fig. 2A). qRT-PCR analyses of homozygous mutant larvae verified that no *cmi* mRNA was produced from either allele (Fig. 2B); however, RNA was still detectable from a divergently transcribed gene (CG5339/*drev*) in the *cmi*<sup>1</sup> mutant. We generated a full-length *cmi* cDNA with a hemagglutinin (HA) epitope-tag at the N-terminus of the open reading frame for rescue analyses. Expression of HA-*cmi* under GAL4 control in transgenic flies was able to restore viability

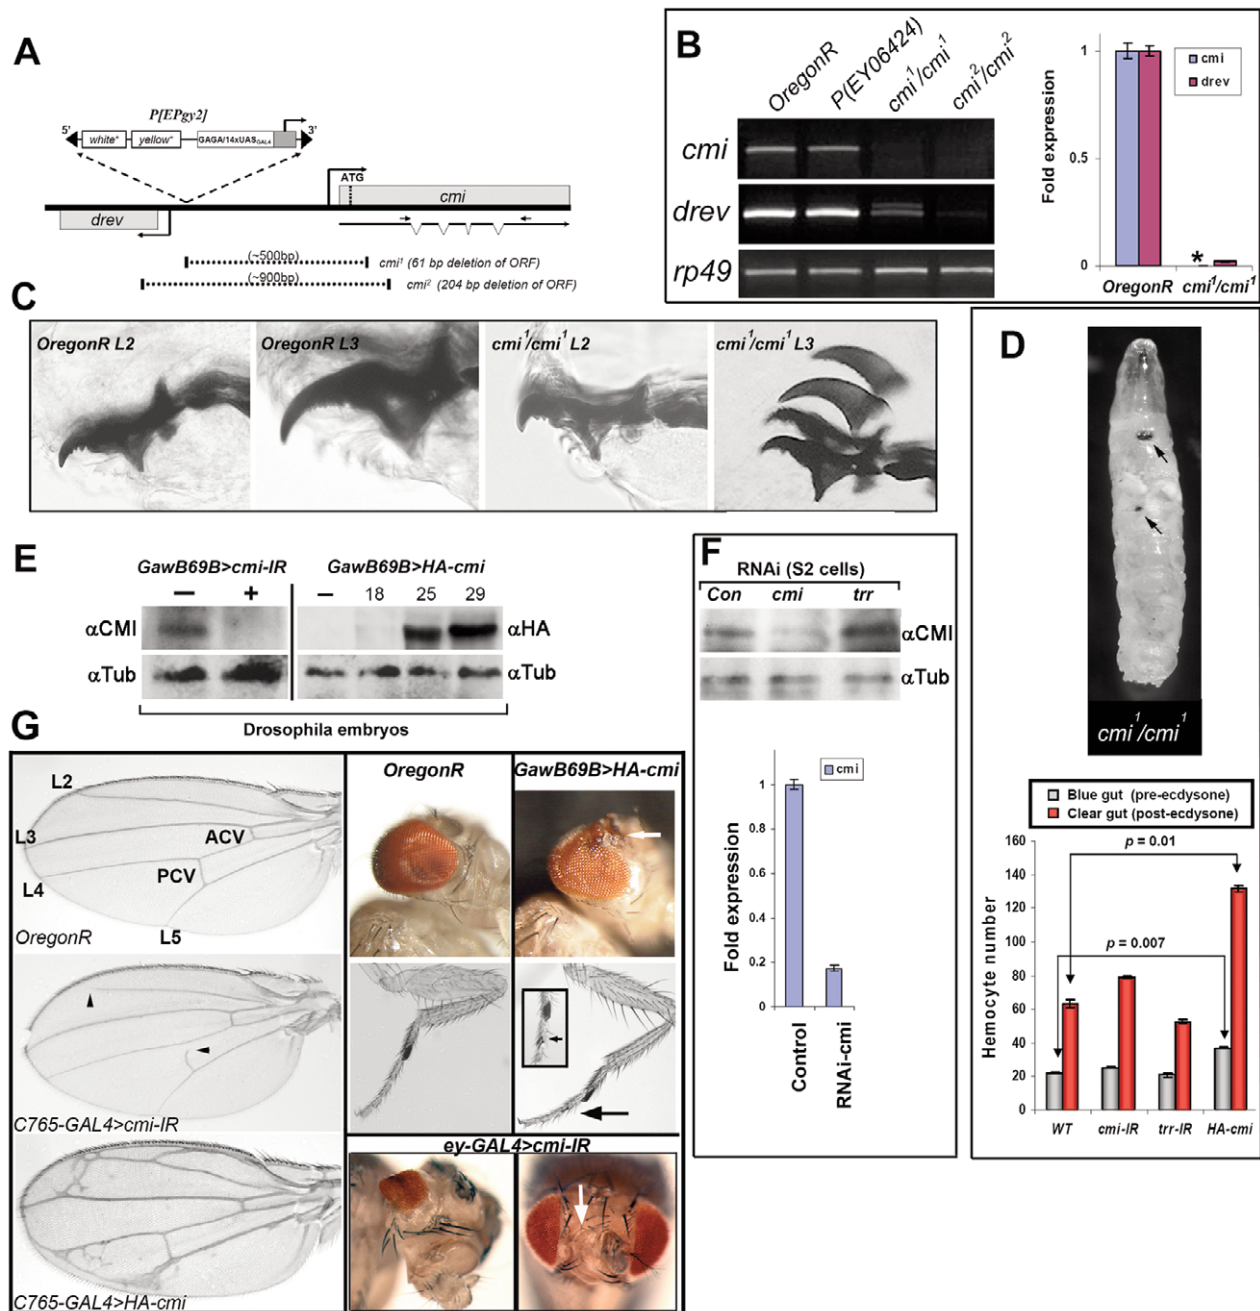

**Fig. 2. Proper CMI expression levels are required for normal development.** (A) The *cmi* gene region, location of the *P[EPgy2]EY06424* insertion and genomic deletions in the *cmi* P-excision mutants. RT-PCR primer sites are indicated by arrows. (B) Transcript analyses of *cmi* and *drev* in wild-type (*OregonR*), *P[EY06424]* and *cmi* mutant (*cmi<sup>1</sup>* and *cmi<sup>2</sup>*) larvae. The ribosomal gene *rp49* served as an RNA control. Quantitative RT-PCR (right panel) confirmed the complete loss of *cmi* mRNA in the *cmi<sup>1</sup>* mutant. Asterisk indicates no mRNA detected. (C) Retained and malformed mouth hooks in *cmi* mutant larvae. Mutants display malformed hooks in L2 and occasionally L2 hooks are retained in L3. (D) Necrotic patches in *cmi* mutant larvae (arrows). Hemocyte counts were analyzed in wild-type (WT; *OregonR*, OR), *cmi-IR*, *trr-IR* and *HA-cmi* staged larvae (before/after ecdysone pulse). Shown are average hemocyte counts per field. Significant differences ( $P \leq 0.01$ ) were only observed comparing OR and *HA-cmi* hemocyte counts at both stages. (E) Depletion and overexpression of *cmi* in *Drosophila* embryos following *P[GawB]69B-GAL4*-dependent RNAi (*cmi-IR*) and overexpression (*HA-cmi*). CMI was detected using  $\alpha$ CMI or  $\alpha$ HA antibodies. Expression of the *HA-cmi* transgene was determined at varying growth temperatures ( $^{\circ}$ C). Tubulin levels served as loading controls ( $\alpha$ Tub). (F) Expression of *cmi* in cultured S2 cells following *cmi* and *trr* RNAi. Knockdown of *cmi* was verified by western blot and qRT-PCR. (G) Proper CMI levels are essential for normal development. Left panels: Positions of veins in wild-type fly wings (*OregonR*) and upon *cmi* depletion (*cmi-IR*) and overexpression (*HA-cmi*) using the wing-specific *C765-GAL4* driver. L2-L5, longitudinal veins; ACV, anterior crossvein; PCV, posterior crossvein. Note the shortening of veins with reduced *cmi* (arrowheads) and ectopic veins with elevated *cmi* levels. Right panels: Modest overexpression of *HA-cmi* at 22 $^{\circ}$ C leads to additional pattern defects including ommatidial disruptions (arrows) and ectopic sex combs (arrow) on the male distal prothoracic tarsi (middle panels, enlarged in inset). RNAi depletion of *cmi* in developing eye discs using *ey-GAL4* at 25 $^{\circ}$ C results in reduced eye size and missing antennae (arrow, lower right). Error bars indicate s.e.m.

to *cmi<sup>1</sup>/Df(2R)or-BR11* hemizygotes, indicating that the lethality observed in the *cmi<sup>1</sup>* mutant resulted from loss of *cmi* function. Second, we generated a *cmi* inverted repeat RNAi transgene (*cmi-IR*) and expressed it together with *Dicer-2* to augment the RNAi effect (Dietzl et al., 2007) in vivo under the control of a GAL4-inducible promoter. Fig. 2E,F shows the levels of CMI upon *cmi* knockdown and overexpression both in vivo and in vitro using S2 cells. Widespread knockdown of *cmi* in the presence of *Dicer-2* resulted in complete lethality (data not shown), whereas knockdown without *Dicer-2* or knockdown in restricted patterns produced partial lethality and a broad range of developmental defects. Thus, the *cmi* gene is essential and the *P*-excision mutant alleles are likely to be null alleles.

To elucidate *cmi* functions in development, we performed a lethal phase analysis using both *cmi* alleles. The majority of homozygous *cmi<sup>1</sup>* and *cmi<sup>2</sup>* mutants failed to survive beyond the second (L2) or early third (L3) larval instar stages; however, substantial maternal contribution of *cmi* mRNA (supplementary material Fig. S1) might mask requirements during embryogenesis. Examination of dying larvae revealed that many had retained larval mouth hooks from the L2 molt and in some cases L2 and L3 mouth hooks were malformed (Fig. 2C), indicating a defect in hormone-dependent cuticle shedding. Mutant larvae exhibited sluggish movement, even though they retained normal olfactory functions, touch sensitivity and phototaxis (data not shown). Feeding *cmi* mutant larvae with ecdysone did not affect the phenotypes, suggesting that *cmi* functions downstream of ecdysone hormone production or secretion.

The *cmi* null mutant larvae eventually stopped moving and appeared to attempt pupariation. They failed to evert their spiracles, frequently turned brown but never produced a pupal cuticle, consistent with disrupted ecdysone hormone signaling associated with reduced EcR function (Bender et al., 1997). Many of the *cmi* larvae also developed interior necrotic patches (Fig. 2D), suggesting defects in larval hematopoiesis (Dearolf, 1998). Circulating larval hemocytes were isolated and counted from blue gut (BG) and clear gut (CG) third instar larvae, stages corresponding to before (BG) or during (CG) peak ecdysone titers. shRNAi depletion of *cmi* or *trr* using the *P[GawB]69B-GAL4* driver led to insignificant changes in the number of circulating hemocytes at the CG stage. By contrast, overexpression of *HA-cmi* resulted in an approximately twofold increase in hemocyte count in both the BG and CG larvae, with no increase in the number of lamellocytes, indicating that the elevated hemocyte numbers were not directly related to ecdysone titers (Fig. 2D).

A requirement for *cmi* in adult tissues was determined using shRNAi depletion and overexpression. We confirmed GAL4-dependent *cmi* shRNAi knockdown and activation of the *HA-cmi* transgene by immunoblot (Fig. 2E). Widespread depletion and high level overexpression of *cmi* result in organismal lethality at various developmental stages (not shown). Targeted depletion of *cmi* in the wing imaginal disc resulted in shortened wing veins (*cmi-IR*; Fig. 2G) that could be enhanced by co-expression of *Dicer-2* (Curtis et al., 2011; Dietzl et al., 2007). Expression of *cmi-IR* in the developing eye imaginal disc resulted in reduced eye size and loss of head and antennal structures (Fig. 2G). By contrast, modest overexpression of *HA-cmi* led to opposite pattern defects in the wing, as well as improper cuticle pigmentation, eye tumors and ectopic sex combs on the distal tarsi of male prothoracic legs (*HA-cmi*; Fig. 2G). Therefore, CMI levels are dose-sensitive for normal development and are under stringent regulation.

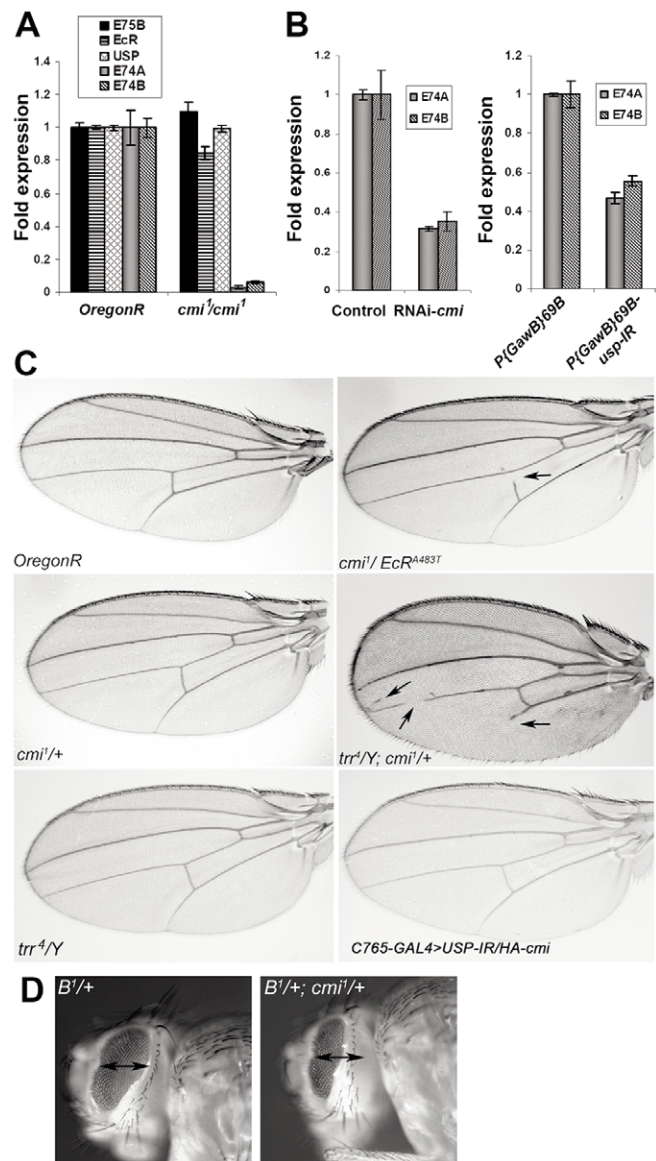

**Fig. 3. CMI functions in the ecdysone response pathway.** (A) qRT-PCR expression of ecdysone pathway regulators in late staged L2 wild-type and *cmi* mutant larvae. (B) Ecdysone-dependent induction of *E74A* and *E74B* transcription is reduced upon depletion of *cmi* in S2 cells and *usp* in vivo. *E74* transcripts were reduced upon RNAi knockdown of *cmi* and upon GAL4-dependent expression of *usp-IR* in early pupae compared with the *P[GawB]69B-GAL4* driver alone. (C) *cmi* interacts genetically with *trr*, *EcR* and *usp*. Shown are wings from wild-type (*OregonR*), *cmi<sup>1</sup>* and *trr<sup>4</sup>* heterozygotes and combinations of a *cmi<sup>1</sup>* null allele with dominant-negative *EcR* or hypomorphic *trr* alleles. Incomplete veins are indicated by arrows. Ectopic veins associated with overexpressed *HA-cmi* are suppressed by simultaneous *usp* depletion. (D) Reduced *cmi* enhances the eye phenotype associated with a *Bar* mutation. The reduced eye phenotype of a heterozygous *B<sup>1</sup>* female (left panel) is exacerbated in the presence of a heterozygous *cmi<sup>1</sup>* mutation (right panel). The arrow lengths in both panels are the same. Error bars indicate s.e.m.

### CMI functions in hormone-dependent gene regulation

Given the likely roles for *cmi* in hormone-regulated development, we examined several ecdysone primary response genes in *cmi<sup>1</sup>* homozygous larvae using quantitative RT-PCR

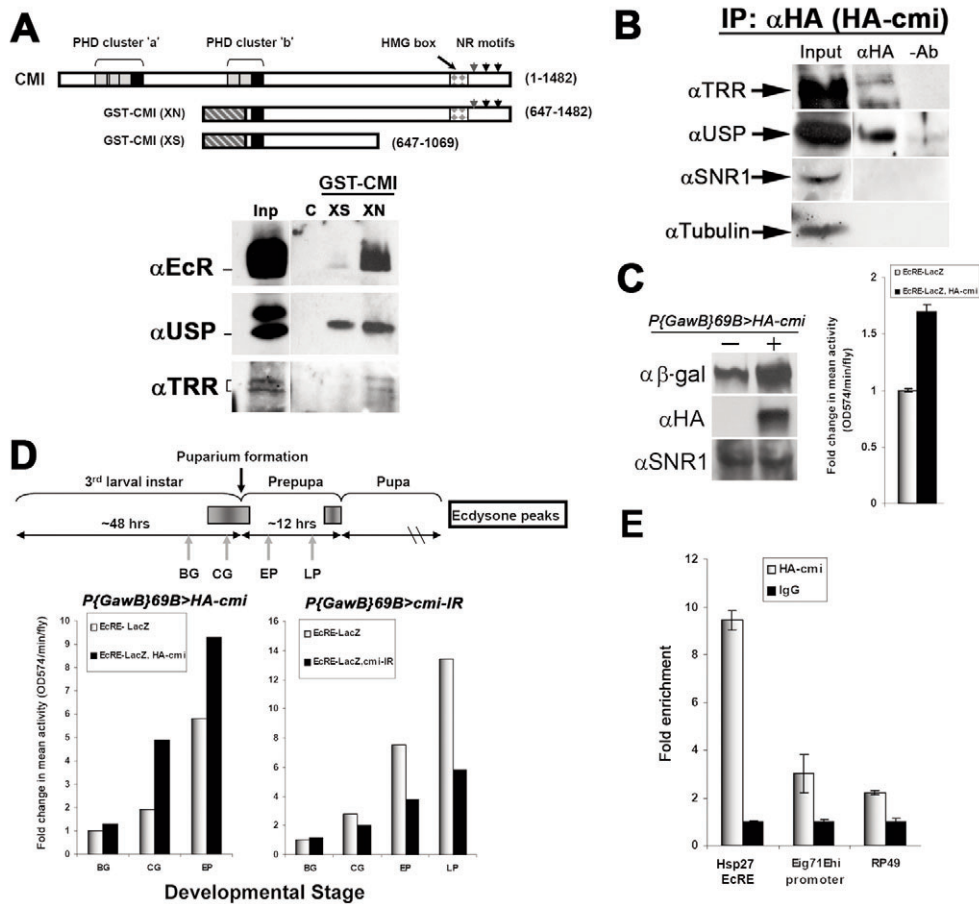

**Fig. 4. CMI associates with TRR, EcR and USP and functions as a co-activator of ecdysone-inducible gene expression.** (A) Portions of CMI with or without the putative nuclear receptor interaction motifs were fused to GST. Embryo extracts (500  $\mu$ g) were added to the glutathione agarose resin containing the immobilized GST and GST-CMI fusions and precipitated material was analyzed by immunoblot. (B) CMI forms complexes with TRR and USP in vivo. Extracts were prepared from embryos expressing HA-CMI using the  $P[GawB]69B-GAL4$  driver. Input lane (100  $\mu$ g) represents 20% of the starting material used for IP. Anti-HA ( $\alpha$ HA) and (-) antibody precipitates were analyzed by immunoblot using antibodies to TRR and USP and control proteins SNR1 and tubulin (Zrally et al., 2003). (C) CMI is a co-activator of ecdysone-dependent transcription of an  $EcRE-lacZ$  reporter gene in vivo. Left: Expression of the  $HA-cmi$  transgene and  $EcRE-lacZ$  ( $\beta$ -galactosidase) were detected by immunoblot. SNR1 served as a control for protein levels. Right: CPRG assays were used to determine fold changes in  $EcRE-lacZ$  activity following expression of  $HA-cmi$ . Extracts were prepared from  $HA-cmi$ ,  $EcRE-lacZ$  recombinant early pupae ( $\pm$  GAL4). (D) CMI co-activator function is ecdysone dependent in vivo. CPRG assays were performed on extracts from staged animals including blue gut (BG), clear gut (CG), early prepupae (EP) and late prepupae (LP).  $EcRE-lacZ$  activity was determined in the presence of  $HA-cmi$  and  $cmi-IR$  expression controlled by  $P[GawB]69B-GAL4$ . (E) CMI associates with the  $Hsp27$  EcR response element (EcRE) in vivo. ChIP analyses were performed using  $P[GawB]69B-GAL4>HA-cmi$  extracts from whole early pupae and  $\alpha$ HA antibodies. qPCR was used to measure enrichment of HA-CMI on the endogenous  $Hsp27$  EcRE. The  $rp49$  gene and ecdysone-dependent  $Eip71Ehi$  promoter that lacks an EcRE served as controls. Error bars indicate s.e.m.

(Fig. 3A). *Ecdysone receptor* (*EcR*), *ultraspiracle* (*usp*) and *E75B* were unaffected, whereas the early ecdysone inducible gene *Eip74EF* showed reduced expression. *Eip74EF* produces two major protein isoforms, E74A and E74B, with common C-terminal ETS DNA-binding domains (Burtis et al., 1990). *E74A* and *E74B* are produced from overlapping transcription units and are coordinately regulated (Fletcher et al., 1995; Karim and Thummel, 1991). We confirmed the downregulation of *E74* using RNAi knockdown of *cmi* in cultured S2 cells with added ecdysone and in vivo depletion of USP, a ligand-dependent activator of *Eip74EF*, at the early pupal (EP) stage (Fig. 3B; refer to Fig. 4D diagram).

TRR serves as a co-activator of EcR-dependent gene activation by virtue of its conserved SET methyltransferase (Sedkov et al., 2003). Like *cmi* null allele mutants, *trr* mutants

are fully recessive (Sedkov et al., 1999) (Fig. 3C, lower left panel). Heterozygous combinations of *cmi* and a weak *trr* viable allele (*trr<sup>d</sup>*) produced flies with defects in wing patterning, as did combinations of *cmi* and an *EcR* dominant-negative mutant (Fig. 3C). The most prominent pattern disruptions appeared as shortened veins. Widespread depletion of *usp* is lethal, whereas shRNAi depletion in wing intervein cells using a *blistered-GAL4* driver produces a crumpled wing phenotype (supplementary material Fig. S2). Simultaneous expression of  $HA-cmi$  with shRNAi *usp* in wing imaginal discs using the  $C765-GAL4$  driver produced normal wings, indicating that the  $HA-cmi$  phenotype (shown in Fig. 2G) is suppressed by reducing USP levels and that, conversely, the effect of moderate depletion of USP is suppressed by elevated CMI levels (Fig. 3C, bottom right panel), suggesting functional association.

Normal eye development requires ecdysone pathway components, including the EcR-USP heterodimer (Cherbas et al., 2003; Ghbeish and McKeown, 2002) and the ecdysone-inducible zinc-finger transcription factor Broad-Complex (BR-C; BR – FlyBase) (Brennan et al., 2001). Progression of the morphogenetic furrow and ommatidial differentiation depend on ecdysone (Brennan et al., 1998). The *B<sup>1</sup>* mutation displays a reduced eye size resulting from incomplete morphogenetic furrow progression that is enhanced by mutations in *ecdysoneless* and *trr* (Sedkov et al., 1999). In a similar fashion, a heterozygous *cmi<sup>1</sup>* allele strongly enhanced the *B<sup>1</sup>* phenotype (Fig. 3D), implicating CMI as a co-activator of EcR-USP functions.

### CMI is a nuclear receptor co-activator

Portions of CMI with or without the NR-binding motifs were fused to GST and used to examine interactions with EcR, USP and TRR in embryo extracts (Fig. 4A). CMI interacted with both EcR and USP, and the most robust interaction involved the receptors and the largest CMI C-terminal fusion that contained the NR motifs. Little interaction was observed with CMI fusions lacking the HMG domain and NR-binding sites. TRR was previously shown to interact with both receptors (Sedkov et al., 2003); therefore, we investigated next whether TRR was part of the complexes formed between CMI and EcR-USP. We found that TRR was able to associate preferentially with a portion of CMI containing the HMG domain and NR interaction motifs (Fig. 4A). To confirm the interactions *in vivo*, we performed co-immunoprecipitation (CoIP) using the HA-tagged full length CMI (Fig. 4B). Immune complexes with CMI were enriched with TRR and USP, suggesting that they formed complexes *in vivo*. EcR showed a similar enrichment with CMI (not shown). As a control, the Brahma (SWI-SNF) complex component SNR1 did not appear to form complexes directly with CMI in this assay. During preparation of this manuscript, Shilatifard and colleagues (Mohan et al., 2011) identified a COMPASS-like complex that contained both TRR and CMI. In their report, they identified CMI as LPT (Lost PHD fingers of TRR).

Next, we tested for the ability of CMI to function as a transcription co-activator for EcR-USP using an *in vivo lacZ* reporter assay (Talbot et al., 1993). The *Hsp27* gene EcR response element (*EcRE*) fused to the *lacZ* gene (*7xEcRE-lacZ*) responds to changes in hormone levels as a reporter for nuclear receptor-regulated transcription activity. Mid-embryonic (8-16 hours after egg laying) extracts have detectable *EcRE-lacZ* expression (Fig. 4C) resulting from EcR-USP activation in response to elevated ecdysone titers (Kozlova and Thummel, 2003; Maróy et al., 1988). *lacZ* levels were strongly upregulated in response to GAL4-driven expression of *HA-cmi*, whereas a control protein (SNR1) showed no change. Quantitative  $\beta$ -galactosidase (CPRG) assays confirmed that *lacZ* levels were elevated ~1.7-fold, consistent with a co-activator function.

To determine whether the CMI co-activator function was hormone dependent, we measured  $\beta$ -galactosidase activity from the *EcRE-lacZ* reporter during the larval-pupal transition stages (Fig. 4D). Quantitative assays were performed using extracts from staged animals with *P[GawB]69B-GAL4*-driven *HA-cmi* and *cmi-IR*. There was little *lacZ* produced in wild-type (*EcRE-lacZ*), *HA-cmi* or *cmi-IR* animals during the larval BG stage. *lacZ* levels increased during subsequent stages presumably in response to hormone-dependent activation. Differences in *lacZ* expression were first apparent at the CG stage when ecdysone titers peak, with *HA-cmi* animals showing substantially higher levels (fivefold vs BG)

compared with wild-type (twofold vs BG). This trend continued in the EP stage; however, by the late prepupal stage (LP), widespread overexpression of *HA-cmi* caused lethality. By contrast, *lacZ* levels were lower in *cmi-IR* animals at all subsequent stages compared with wild type, indicating that CMI is required for ecdysone stimulated transcription of the *EcRE-lacZ* reporter.

Based on our observed genetic and physical interactions between CMI and EcR-USP, we next sought to determine whether CMI was recruited to ecdysone response elements *in vivo* (Fig. 4E). Chromatin immunoprecipitation using whole animal extracts prepared from early pupae expressing HA-CMI and antibodies to the HA epitope revealed that CMI was strongly enriched at the endogenous *Hsp27 EcRE*, but not at another ecdysone inducible gene (*Eig71Eh-i* promoter) (Wright et al., 1996; Zraly et al., 2006) that lacks an *EcRE*, or at a control (*rp49*) gene. We conclude that CMI is a hormone-dependent co-activator of nuclear receptor-stimulated transcription.

### CMI is a chromatin-binding protein

The CMI protein contains two PHD finger clusters (Fig. 1A) that are strongly conserved among MLL family proteins and are closely related to similar PHD fingers found in a variety of chromatin-binding proteins involved in transcription regulation (Fortschegger and Shiekhhattar, 2011; Yap and Zhou, 2010). The CMI cluster 'b' PHD fingers (Fig. 5A) appear to be the most highly conserved and similar PHD fingers have been shown in some instances to recognize and bind histone H3 N-terminal tails, with distinct specificities. An alignment of type 3 PHD fingers (PHDf3) (Chang et al., 2010; Park et al., 2010; Wang et al., 2010) similar to CMI is shown in Fig. 5A, including those known to bind H3K4me2/3 *in vitro*. A fusion of the CMI PHDf3.b to GST was used to determine whether it was able to bind histones *in vivo* and *in vitro*. Analysis of native histones obtained from cultured S2 cells revealed that the PHDf3.b was able to bind histone H3, but not H4, H2A or H2B (Fig. 5B; data not shown). We confirmed this result by generating a mutant version of the CMI PHDf3.b that carried an amino acid change (W680A) predicted to disrupt histone binding (Pena et al., 2006). Surprisingly, neither wild type nor mutant GST-CMI PHDf3.b fusions showed preferential binding to native H3K4me3. Instead, the wild type but not the mutant GST fusion was capable of binding bulk histone H3 as well as H3K4me2 (supplementary material Fig. S3). Unlike vertebrate MLL1 and *Drosophila* TRX, the CMI PHDf3.b was unable to bind the cyclophilin CYP33, which is implicated in controlling MLL and TRX functions (Anderson et al., 2002; Fair et al., 2001; Hom et al., 2010; Park et al., 2010; Wang et al., 2010). Modified and unmodified histone H3 N-terminal peptides (aa 1-21) fused to biotin were used in pulldown assays to determine whether the PHDf3.b of CMI could recognize and bind H3K4me3 *in vitro* (Fig. 5C). Similar to the native histones, the CMI PHDf3.b was able to bind unmodified histone H3 and mono- and dimethylated H3K4 but not H3K4me3 peptides, and the W680A mutant was unable to bind any of the biotinylated peptides. To test whether this was a conserved feature of the MLL family PHDf3.b domains, we generated a GST fusion of the MLL2 PHDf3.b (aa 1503-1560) and found a pattern of histone peptide recognition similar to CMI. As a positive control, the PHDf3 of the LID demethylase demonstrated strong preference for H3K3me2/3 (Li et al., 2010). Thus, similar to other closely related PHDf3 domains, the CMI and MLL2 PHDf3 domains appear to be able to accommodate and bind to H3K4 with methylated sidechains. However, despite their similarity to the MLL1 and LID PHDf3 domains, the CMI and MLL2 PHDf3.b

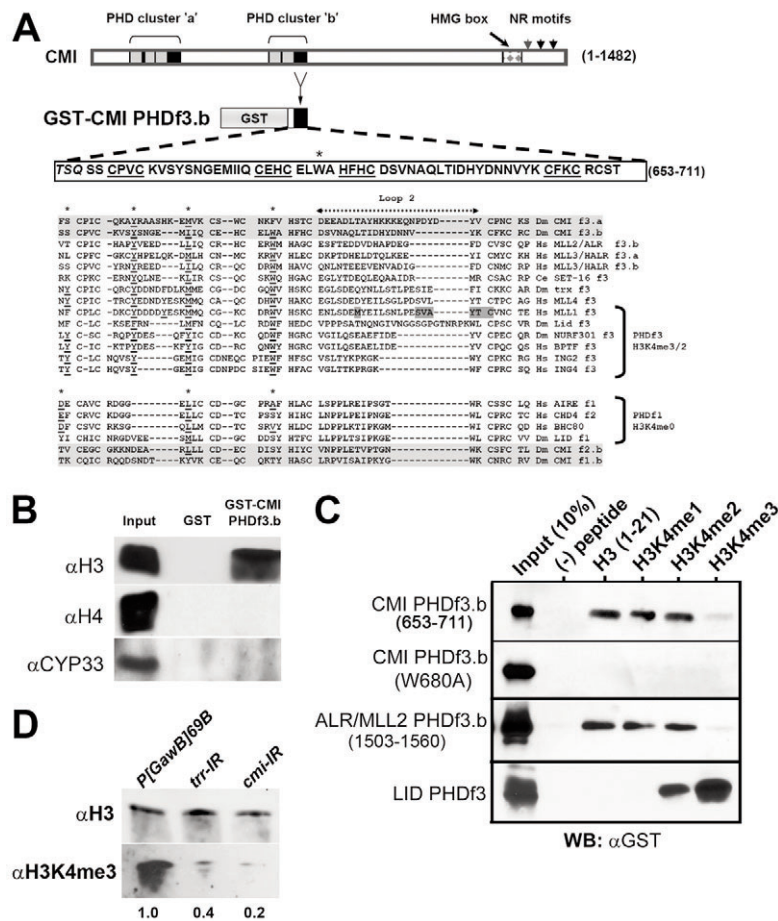

**Fig. 5. CMI is a chromatin-binding protein and is required for proper histone methylation in vivo.**

(A) PHD type 3 finger comparisons and schematic of the GST-CMI PHDf3 construct with the zinc-coordinating sequences underlined. The CMI PHDf3 regions are highlighted in the alignment. Residues important for the binding of PHDf3 domains to H3K4me3 are underlined and indicated by asterisks. Amino acids important for interaction between PHDf3 of MLL1 and cyclophilin CYP33 are shaded. Hs, *Homo sapiens*; D, *Drosophila melanogaster*; Ce, *Caenorhabditis elegans*. (B) CMI PHDf3.b region associates with native histone H3. Native histones prepared from S2 cells were incubated with similar amounts of solubilized GST alone or GST-CMI PHDf3.b immobilized on glutathione agarose resin. Precipitated proteins were probed by immunoblot for histones H3 and H4, and CYP33. (C) The CMI and MLL2 PHDf3.b binds non-methylated H3, H3K4me1 and H3K4me2. Biotinylated histone peptides were incubated with similar amounts of GST-CMI PHDf3.b, GST-CMI PHDf3.b (W680A), GST-ALR/MLL2 and GST-LID. Bound GST fusions were analyzed by immunoblot with  $\alpha$ GST antibodies. (D) CMI is required for normal levels of H3K4me3 in vivo. Native histones were prepared from early pupae expressing GAL4 alone (*P[GawB]69B-GAL4* driver) and *trr-IR* or *cmi-IR* transgenes. Extracts were probed by immunoblot. The values shown under each lane represent band intensities compared with driver control normalized to H3 levels.

domains do not show a preference for recognition and binding of H3K4me3, suggesting that their primary recognition target might be another substrate.

We sought next to determine whether loss of CMI would impact chromatin methylation in vivo. Previous studies indicated that in vivo depletion of *Caenorhabditis set-16* (Fisher et al., 2010) and *Drosophila trr* in S2 cells (Ardehali et al., 2011) resulted in diminished H3K4 trimethylation as determined by immunoblot. Depletion of *trr* in *Drosophila* L3 wing discs also appeared to result in modest reductions in H3K4me3 levels by immunofluorescence (Mohan et al., 2011). Widespread depletion of *trr* in early pupae using shRNAi resulted in reduced global trimethylation of H3K4 (Fig. 5D), consistent with reductions in methyltransferase activity (Sedkov et al., 2003). Importantly, widespread depletion of *cmi* also resulted in a decreased global appearance of H3K4me3 marks, suggesting that histone binding by CMI might help to stabilize H3K4me3 in vivo. To our knowledge, the CMI type 3 PHD finger is the first example of a PHDf3 that can accommodate H3K4me0/1/2 marks, but not H3K4me3, suggesting a distinctly different role in transcription regulation.

### CMI biological functions depend on other co-activator complex factors

In vertebrates, MLL2 and MLL3 are found in large Set1/COMPASS-like complexes (Eissenberg and Shilatifard, 2010). These include common subunits that are highly conserved (Ruthenburg et al., 2007), including ASH2, WDR5, RBBP5 and DPY30. The MLL2-MLL3 complexes contain additional subunits

that appear to be specific for hormone-dependent gene regulation, including the histone H3K27 demethylase UTX(KDM6A)-UTY, nuclear transactivation protein PTIP, NCOA6 and PA1. We therefore questioned whether CMI biological functions are dependent on other putative COMPASS-like components. Moderate depletion of *cmi* in the developing wing displayed weak pattern disruptions that were enhanced by simultaneous expression of *Dicer-2* (Fig. 6A,B), indicating that the phenotypes were dose-sensitive for *cmi* function. Similarly, depletion of *trr* (*trr-IR*; Fig. 6G) resulted in shortened longitudinal and crossveins. Co-expression of *cmi-IR* and *trr-IR* resulted in further shortening of the veins, indicative of a genetic cooperation (Fig. 6C). By contrast, co-expression of *ash2-IR* or *wds-IR* (Hallson et al., 2012) produced little enhancement of the *cmi-IR* phenotype (Fig. 6D,E), suggesting that ASH2 and WDS are not dose limiting in this assay. Co-expression of *Utx-IR* with *cmi-IR* produced the strongest enhancing interaction (Fig. 6F). Modest depletion of *ash2*, *wds* and *Utx* independently under identical conditions had no obvious wing phenotype (not shown).

Having established genetic relationships between putative complex co-factors through enhancing *cmi* loss-of-function phenotypes, we next sought to verify the interactions by testing whether limiting these factors would suppress a *HA-cmi* overexpression phenotype (Fig. 6H). Co-expression of *HA-cmi* with *trr-IR* resulted in almost complete suppression of the *HA-cmi* phenotype (Fig. 6I). Importantly, the wings displayed the *trr* loss-of-function phenotype (Fig. 6G), suggesting that although the *HA-cmi* phenotype was dependent on *trr*, the overexpression of *cmi* could not compensate for loss of *trr* function. Reductions of *ash2*



and *wds* moderately suppressed the effects of overexpressed *HA-cmi* (Fig. 6J,K), whereas reduction of *Utx* showed almost complete suppression (Fig. 6L). Significantly, in these assays TRR is present (except for *trr-IR*), allowing us to examine effects of altering *cmi* levels independent of the H3K4 methyltransferase activity. We conclude that UTX H3K27 demethylase activity is required along with histone binding functions of CMI and the H3K4 methyltransferase activity of TRR to activate nuclear receptor target genes.

## DISCUSSION

Although the precise roles of proteins directly participating in nuclear receptor signaling remain largely speculative, many are thought to regulate transcription through effects on chromatin (Bannister and Kouzarides, 2011). The MLL2 and MLL3 co-activators function to epigenetically decode or modify histone lysine residues and provide activation functions for NR signaling at target genes (Eissenberg and Shilatifard, 2010). In *Drosophila*, CMI and TRR together have a single MLL family homolog. To our knowledge, this is the first example of an evolutionary ‘splitting’ of an epigenetic regulator involved in nuclear receptor signaling, whereby the essential gene regulatory functions of one protein have been parsed into two distinct proteins. CMI forms complexes with TRR, associates directly with hormone receptors and interacts with other putative COMPASS-like components, suggesting that *Drosophila* contains a functional counterpart to the mammalian ASCOM-MLL2 nuclear receptor co-activator complex (our results) (Mohan et al., 2011).

The MLL histone lysine methyltransferases (KMTs) can be divided into two conserved groups, the MLL1-MLL4(2) and MLL2(4)/ALR-MLL3/HALR subfamilies. Each MLL member is capable of forming related discrete complexes with several common components. The MLL-based complexes activate transcription in part through methyltransferase activity on histone H3 Lys4 residues within promoter-associated nucleosomes (Eissenberg and Shilatifard, 2010; Martin and Zhang, 2005). There might be partial functional overlap between MLL2 and MLL3 (Lee, J. et al., 2008); however, they are not redundant with the MLL1-MLL4 subfamily. The SET-domain methyltransferase activity of the MLL proteins is essential for transcription activation through histone lysine methylation, but the precise biological role of PHD fingers remains somewhat elusive. Closely related PHDF3 fingers bind H3K4me3/2, the product of the methyltransferase activity. Within the context of a single protein, such as MLL1, the PHDF3 recognition and binding of H3K4me3 is required for transcription activation of target genes (Chang et al., 2010).

Our findings that CMI and TRR function coordinately in a COMPASS-like complex suggest that *cmi* and *trr* probably split from a common ancestor. Gene-protein fusions are four times more common than fissions, perhaps reflecting a simpler genetic event (Kummerfeld and Teichmann, 2005). In cases in which fissions occur, it has been suggested that many involve subunits of multimeric complexes in which the two independent proteins interact physically (Kummerfeld and Teichmann, 2005). The process of splitting into two independent genes might involve gene duplication with subsequent partial degeneration, as has been observed in the *monkey king* (*mkg*) gene family in *Drosophila* (Wang et al., 2004).

The notion that a large protein contains domains that function both together and independently is not without precedent. TRX and MLL1 are cleaved by a specific protease, *taspase-1*. The two ‘halves’ interact with each other in a functional complex, but there is evidence that the N-terminal TRX peptide (TRX-N) binds

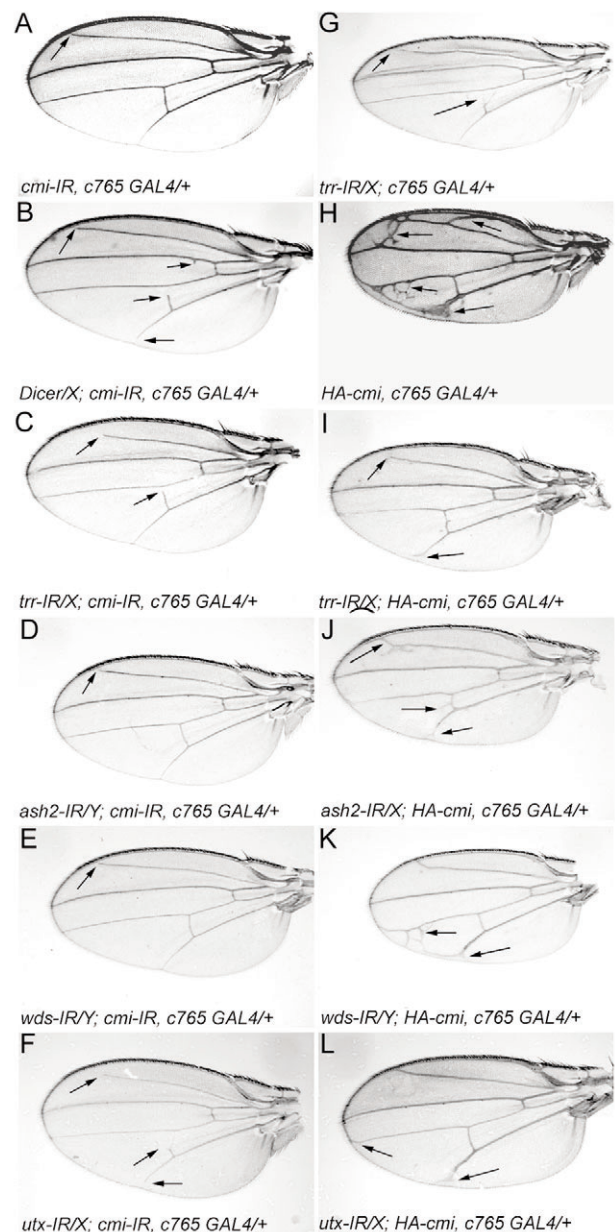

**Fig. 6. *cmi* interacts genetically with predicted components of a *Drosophila* MLL2 COMPASS-related co-activator complex.**

(A–L) Reduction of putative MLL2 complex components enhances wing phenotypes associated with reduced *cmi* function (A–F) and suppresses the effects of ectopic *HA-cmi* (H–L). Wing vein patterns were assessed following co-expression of *cmi-IR* or *HA-cmi* transgenes together with inverted repeats (IR) targeting putative MLL2 complex components (*trr-IR*, *ash2-IR*, *wds/wdr5-IR*, *utx/uty-IR*) using the *C765-GAL4* driver in wing imaginal discs at 25°C. Mild pattern disruptions occur with moderate depletion of *cmi* (A), whereas stronger effects are observed using co-expression of *Dicer-2* (B). Arrows in each panel indicate the appearance of either shortened or ectopic veins associated with the genetic combination being tested.

chromatin without its TRX-C partner in transcribed regions of Hox genes (Schuettengruber et al., 2009; Schwartz et al., 2010). Transcription factor TFIIA and herpes simplex virus host cell factor (HCF1) are cleaved during maturation, with both halves necessary for a functional product (Hsieh et al., 2003). There is presently no evidence that MLL2 or MLL3 are cleaved or processed.

An important question is whether both the chromatin-binding and methyltransferase functions of the MLL family are required for transcription activation. Our data indicate that depletion of *trr* can suppress the effects of overexpressing *cmi*, suggesting that the activation potential of CMI depends on TRR methyltransferase activity. Similarly, simultaneous depletion of *cmi* and *trr* produces stronger phenotypes than depletion of either alone, indicative of cooperation on similar gene targets. Moreover, in vivo depletion of *cmi* results in reduced global H3 trimethylation, despite a functional *trr* gene.

### Developmental functions of CMI

Phenotypes associated with changes in CMI levels reveal important functions in hormone-regulated development. The larval defects in molting, morphogenetic furrow progression and necrosis associated with a *cmi* null allele, similar to *trr* (Sedkov et al., 2003), are consistent with impaired hormone signaling. Similarly, depletion of *MLL2* in HeLa cells using siRNA led to reduced expression of genes known to be important for development and trimethylation of H3K4 was reduced at some promoters (Issaeva et al., 2007). Knockdown of *MLL2* in MCF-7 cells impaired estrogen receptor (ER $\alpha$ ) transcription activity and inhibited estrogen-dependent growth (Mo et al., 2006). Inactivation of the murine *Mll3* resulted in stunted growth and reduced PPAR $\gamma$ -dependent adipogenesis with increased insulin sensitivity (Lee, J. et al., 2008). Perhaps reflecting synonymous functions in *Drosophila*, *cmi/CG5591* was found to be important for regulating muscle triglyceride levels, suggesting conserved adipogenic functions (Pospisilik et al., 2010). Furthermore, *CG5591* (*cmi*) is involved in phagocytosis (Stroschein-Stevenson et al., 2006) and regulation of caspase functions in response to cellular stress (Yi et al., 2007), implicating *cmi* in immune-cell regulation. The increased hemocyte number associated with elevated CMI suggests functions in hemocyte development, perhaps as an effector of chromatin remodeling (Badenhorst et al., 2002) or signaling (JAK/STAT, Hedgehog, Notch) pathways (Crozier and Meister, 2007; Hou et al., 2002). It was previously shown that *trr* was important for Hedgehog (HH)-dependent signaling during eye development (Sedkov et al., 2003) and our *cmi* overexpression and depletion data are consistent with that possibility. However, the dosage-dependent *cmi* wing phenotypes are not consistent with changes in HH signaling (Baker, 2007), raising the possibility that *cmi* and *trr* are important for other growth and signaling pathways in wing development, including Decapentaplegic (DPP/TGF $\beta$ ) and Wingless (WG/WNT) pathways (Blair, 2007).

Several steps are involved in activation of hormone-responsive target genes, including methylation of H3K4 by the MLL2-MLL3 COMPASS-like complex and displacement of demethylases (Vicent et al., 2011). Reduced *cmi* function resulted in lower hormone-responsive enhancer activation and genetic interactions between *cmi*, *trr* and *Utx* revealed that chromatin binding by CMI was important for gene activation in vivo. Furthermore, RNAi depletion of *Utx* suppressed *HA-cmi* overexpression wing phenotypes, suggesting that demethylation of H3K27 is a pre-requisite for activation of some hormone target genes. This is supported by genetic evidence from *C. elegans* that indicated both histone H3K4 methylation by SET-16 (MLL2/MLL3 ortholog) and H3K27 demethylation by UTX-1 were required for attenuation of RAS signaling in the vulva (Fisher et al., 2010; Li and Kelly, 2011) and MLL2-MLL3 complex-related components were required for

proper germ line development (Li and Kelly, 2011). Our genetic epistasis data reveals that *Utx*, *trr* and *cmi* functions are all required for activation in *Drosophila*.

Unexpectedly, the CMI PHDf3.b showed binding to mono- and dimethylated H3K4, rather than trimethylated H3K4 (Sanchez and Zhou, 2011). Although CMI contains two PHDf3 domains in two clusters similar to MLL3, MLL2 contains one PHDf3 most closely related to the CMI and MLL3 PHDf3.b domains. The second cluster appears in all isoforms of MLL3, whereas the N-terminal 'a' cluster is optional (Ruault et al., 2002). Additionally, the 'b' cluster is more closely related to the PHD cluster found in other MLL family proteins (Eissenberg and Shilatifard, 2010). PHD modules are thought to bind histones and present tail residues to the modifying enzyme subunits or stabilize those enzymes with their substrates (Musselman and Kutateladze, 2011). Recently, RNAi knockdown of *trr* in S2 cells was shown to affect H3K4 mono-, di-, and trimethylation, revealing widespread functions in regulating methylation in vivo (Ardehali et al., 2011) and suggesting that loss of TRR might destabilize the co-activator complex leading to de-protection of H3K4 methylation. One possibility is that CMI binds mono- and dimethylated H3K4 to prevent demethylation and stabilize TRR to allow for hormone-stimulated methylation and gene activation. CMI might disengage to allow for removal of methylation marks as hormone levels decrease and gene transcription is reduced. In contrast to MLL1-TRX function in maintenance of active gene transcription, CMI and TRR might be required for NR-targeted gene activation in response to temporally restricted hormone-dependent genome reprogramming.

### Acknowledgements

We thank A. Mazo, Y. Sedkov, R. Barrio, J. Secombe, C. Thummel for reagents, including antibodies and fly mutants; V. Boddapati for phylogenetic analyses; the Bloomington *Drosophila* Stock Center, Vienna *Drosophila* RNAi Center and National Institute of Genetics Fly Resource Center for GAL4 driver and RNAi transgenic lines.

### Funding

This work was supported by grants from the National Institutes of Health [1PO1-CA105049-01 to M.O.D.] and National Science Foundation [MCB0818620, MCB1122001 to A.K.D.]. Deposited in PMC for release after 12 months.

### Competing interests statement

The authors declare no competing financial interests.

### Supplementary material

Supplementary material available online at <http://dev.biologists.org/lookup/suppl/doi:10.1242/dev.076687/-DC1>

### References

- Anderson, M., Fair, K., Amero, S., Nelson, S., Harte, P. J. and Diaz, M. O. (2002). A new family of cyclophilins with an RNA recognition motif that interact with members of the trx/MLL protein family in *Drosophila* and human cells. *Dev. Genes Evol.* **212**, 107-113.
- Ardehali, M. B., Mei, A., Zobeck, K. L., Caron, M., Lis, J. T. and Kusch, T. (2011). *Drosophila* Set1 is the major histone H3 lysine 4 trimethyltransferase with role in transcription. *EMBO J.* **30**, 2817-2828.
- Badenhorst, P., Voas, M., Rebay, I. and Wu, C. (2002). Biological functions of the ISWI chromatin remodeling complex NURF. *Genes Dev.* **16**, 3186-3198.
- Baker, N. E. (2007). Patterning signals and proliferation in *Drosophila* imaginal discs. *Curr. Opin. Genet. Dev.* **17**, 287-293.
- Bannister, A. J. and Kouzarides, T. (2011). Regulation of chromatin by histone modifications. *Cell Res.* **21**, 381-395.
- Bender, M., Imam, F. B., Talbot, W. S., Ganetzky, B. and Hogness, D. S. (1997). *Drosophila* ecdysone receptor mutations reveal functional differences among receptor isoforms. *Cell* **91**, 777-788.
- Blair, S. S. (2007). Wing vein patterning in *Drosophila* and the analysis of intercellular signaling. *Annu. Rev. Cell Dev. Biol.* **23**, 293-319.

- Brennan, C. A., Ashburner, M. and Moses, K. (1998). Ecdysone pathway is required for furrow progression in the developing *Drosophila* eye. *Development* **125**, 2653-2664.
- Brennan, C. A., Li, T. R., Bender, M., Hsiung, F. and Moses, K. (2001). Broad-complex, but not ecdysone receptor, is required for progression of the morphogenetic furrow in the *Drosophila* eye. *Development* **128**, 1-11.
- Brumby, A. M., Zraly, C. B., Horsfield, J. A., Secombe, J., Saint, R., Dingwall, A. K. and Richardson, H. (2002). *Drosophila* cyclin E interacts with components of the Brahma complex. *EMBO J.* **21**, 3377-3389.
- Bulyanko, Y. A. and O'Malley, B. W. (2011). Nuclear receptor coactivators: Structural and functional biochemistry. *Biochemistry* **50**, 313-328.
- Burtis, K. C., Thummel, C. S., Jones, C. W., Karim, F. D. and Hogness, D. S. (1990). The *Drosophila* 74EF early puff contains E74, a complex ecdysone-inducible gene that encodes two ets-related proteins. *Cell* **61**, 85-99.
- Chang, P. Y., Hom, R. A., Musselman, C. A., Zhu, L., Kuo, A., Gozani, O., Kutateladze, T. G. and Cleary, M. L. (2010). Binding of the MLL PHD3 finger to histone H3K4me3 is required for MLL-dependent gene transcription. *J. Mol. Biol.* **400**, 137-144.
- Cherbas, L., Hu, X., Zhimulev, I., Belyaeva, E. and Cherbas, P. (2003). EcR isoforms in *Drosophila*: testing tissue-specific requirements by targeted blockade and rescue. *Development* **130**, 271-284.
- Cho, Y. W., Hong, T., Hong, S., Guo, H., Yu, H., Kim, D., Guszczynski, T., Dressler, G. R., Copeland, T. D., Kalkum, M. et al. (2007). PTIP associates with MLL3- and MLL4-containing histone H3 lysine 4 methyltransferase complex. *J. Biol. Chem.* **282**, 20395-20406.
- Christianson, A. M., King, D. L., Hatzivassiliou, E., Casas, J. E., Hallenbeck, P. L., Nikodem, V. M., Mitsialis, S. A. and Kafatos, F. C. (1992). DNA binding and heteromerization of the *Drosophila* transcription factor chorion factor 1/ultraspiracle. *Proc. Natl. Acad. Sci. USA* **89**, 11503-11507.
- Crozatier, M. and Meister, M. (2007). *Drosophila* haematopoiesis. *Cell Microbiol.* **9**, 1117-1126.
- Curtis, B. J., Zraly, C. B., Marendá, D. R. and Dingwall, A. K. (2011). Histone lysine demethylases function as co-repressors of SWI/SNF remodeling activities during *Drosophila* wing development. *Dev. Biol.* **350**, 534-547.
- Dearolf, C. R. (1998). Fruit fly "leukemia". *Biochim. Biophys. Acta* **1377**, M13-M23.
- Dietzl, G., Chen, D., Schnorrer, F., Su, K. C., Barinova, Y., Fellner, M., Gasser, B., Kinsey, K., Oettel, S., Scheiblaue, S. et al. (2007). A genome-wide transgenic RNAi library for conditional gene inactivation in *Drosophila*. *Nature* **448**, 151-156.
- Dingwall, A. K., Beek, S. J., McCallum, C. M., Tamkun, J. W., Kalpana, G. V., Goff, S. P. and Scott, M. P. (1995). The *Drosophila* snr1 and brm proteins are related to yeast SWI/SNF proteins and are components of a large protein complex. *Mol. Biol. Cell* **6**, 777-791.
- Eissenberg, J. C. and Shilatifard, A. (2010). Histone H3 lysine 4 (H3K4) methylation in development and differentiation. *Dev. Biol.* **339**, 240-249.
- Fair, K., Anderson, M., Bulanova, E., Mi, H., Tropschug, M. and Diaz, M. O. (2001). Protein interactions of the MLL PHD fingers modulate MLL target gene regulation in human cells. *Mol. Cell Biol.* **21**, 3589-3597.
- Fisher, K., Southall, S. M., Wilson, J. R. and Poulin, G. B. (2010). Methylation and demethylation activities of a *C. elegans* MLL-like complex attenuate RAS signalling. *Dev. Biol.* **341**, 142-153.
- Fletcher, J. C., Burtis, K. C., Hogness, D. S. and Thummel, C. S. (1995). The *Drosophila* E74 gene is required for metamorphosis and plays a role in the polytene chromosome puffing response to ecdysone. *Development* **121**, 1455-1465.
- Fortschegger, K. and Shiekhattar, R. (2011). Plant homeodomain fingers form a helping hand for transcription. *Epigenetics* **6**, 4-8.
- Ghbeish, N. and McKeown, M. (2002). Analyzing the repressive function of ultraspiracle, the *Drosophila* RXR, in *Drosophila* eye development. *Mech. Dev.* **111**, 89-98.
- Goo, Y. H., Sohn, Y. C., Kim, D. H., Kim, S. W., Kang, M. J., Jung, D. J., Kwak, E., Barlev, N. A., Berger, S. L., Chow, V. T. et al. (2003). Activating signal cointegrator 2 belongs to a novel steady-state complex that contains a subset of trithorax group proteins. *Mol. Cell Biol.* **23**, 140-149.
- Hallson, G., Hollebakken, R. E., Li, T., Syrzycka, M., Kim, I., Cotsworth, S., Fitzpatrick, K. A., Sinclair, D. A. and Honda, B. M. (2012). dSet1 is the main H3K4 di- and tri-methyltransferase throughout *Drosophila* development. *Genetics* **190**, 91-100.
- Hom, R. A., Chang, P. Y., Roy, S., Musselman, C. A., Glass, K. C., Selezneva, A. I., Gozani, O., Ismagilov, R. F., Cleary, M. L. and Kutateladze, T. G. (2010). Molecular mechanism of MLL PHD3 and RNA recognition by the Cyp33 RRM domain. *J. Mol. Biol.* **400**, 145-154.
- Hou, S. X., Zheng, Z., Chen, X. and Perrimon, N. (2002). The Jak/STAT pathway in model organisms: emerging roles in cell movement. *Dev. Cell* **3**, 765-778.
- Hsieh, J. J., Cheng, E. H. and Korsmeyer, S. J. (2003). Taspase1: a threonine aspartase required for cleavage of MLL and proper HOX gene expression. *Cell* **115**, 293-303.
- Issaeva, I., Zonis, Y., Rozovskaia, T., Orlovsky, K., Croce, C. M., Nakamura, T., Mazo, A., Eisenbach, L. and Canaani, E. (2007). Knockdown of ALR (MLL2) reveals ALR target genes and leads to alterations in cell adhesion and growth. *Mol. Cell Biol.* **27**, 1889-1903.
- Karim, F. D. and Thummel, C. S. (1991). Ecdysone coordinates the timing and amounts of E74A and E74B transcription in *Drosophila*. *Genes Dev.* **5**, 1067-1079.
- Kim, D. H., Lee, J., Lee, B. and Lee, J. W. (2009). ASCOM controls farnesoid X receptor transactivation through its associated histone H3 lysine 4 methyltransferase activity. *Mol. Endocrinol.* **23**, 1556-1562.
- King-Jones, K. and Thummel, C. S. (2005). Nuclear receptors – a perspective from *Drosophila*. *Nat. Rev. Genet.* **6**, 311-323.
- Koelle, M. R., Talbot, W. S., Segraves, W. A., Bender, M. T., Cherbas, P. and Hogness, D. S. (1991). The *Drosophila* EcR gene encodes an ecdysone receptor, a new member of the steroid receptor superfamily. *Cell* **67**, 59-77.
- Kozlova, T. and Thummel, C. S. (2003). Essential roles for ecdysone signaling during *Drosophila* mid-embryonic development. *Science* **301**, 1911-1914.
- Kummerfeld, S. K. and Teichmann, S. A. (2005). Relative rates of gene fusion and fission in multi-domain proteins. *Trends Genet.* **21**, 25-30.
- Lam, G. and Thummel, C. S. (2000). Inducible expression of double-stranded RNA directs specific genetic interference in *Drosophila*. *Curr. Biol.* **10**, 957-963.
- Lee, J., Saha, P. K., Yang, Q. H., Lee, S., Park, J. Y., Suh, Y., Lee, S. K., Chan, L., Roeder, R. G. and Lee, J. W. (2008). Targeted inactivation of MLL3 histone H3-Lys-4 methyltransferase activity in the mouse reveals vital roles for MLL3 in adipogenesis. *Proc. Natl. Acad. Sci. USA* **105**, 19229-19234.
- Lee, J., Kim, D. H., Lee, S., Yang, Q. H., Lee, D. K., Lee, S. K., Roeder, R. G. and Lee, J. W. (2009). A tumor suppressive coactivator complex of p53 containing ASC-2 and histone H3-lysine-4 methyltransferase MLL3 or its paralogue MLL4. *Proc. Natl. Acad. Sci. USA* **106**, 8513-8518.
- Lee, S., Lee, D. K., Dou, Y., Lee, J., Lee, B., Kwak, E., Kong, Y. Y., Lee, S. K., Roeder, R. G. and Lee, J. W. (2006). Coactivator as a target gene specificity determinant for histone H3 lysine 4 methyltransferases. *Proc. Natl. Acad. Sci. USA* **103**, 15392-15397.
- Lee, S., Lee, J., Lee, S.-K. and Lee, J. W. (2008). Activating signal cointegrator-2 is an essential adaptor to recruit histone H3 lysine 4 methyltransferases MLL3 and MLL4 to the liver X receptors. *Mol. Endocrinol.* **22**, 1312-1319.
- Li, L., Greer, C., Eisenman, R. N. and Secombe, J. (2010). Essential functions of the histone demethylase lid. *PLoS Genet.* **6**, e1001221.
- Li, T. and Kelly, W. G. (2011). A role for Set1/MLL-related components in epigenetic regulation of the *Caenorhabditis elegans* germ line. *PLoS Genet.* **7**, e1001349.
- Lonard, D. M. and O'Malley, B. W. (2006). The expanding cosmos of nuclear receptor coactivators. *Cell* **125**, 411-414.
- Lonard, D. M. and O'Malley, B. W. (2007). Nuclear receptor coregulators: judges, juries, and executioners of cellular regulation. *Mol. Cell* **27**, 691-700.
- Lonard, D. M., Lanz, R. B. and O'Malley, B. W. (2007). Nuclear receptor coregulators and human disease. *Endocr. Rev.* **28**, 575-587.
- Maróy, P., Kaufmann, G. and Dübendorfer, A. (1988). Embryonic ecdysteroids of *Drosophila melanogaster*. *J. Insect Phys.* **34**, 633-637.
- Martin, C. and Zhang, Y. (2005). The diverse functions of histone lysine methylation. *Nat. Rev. Mol. Cell Biol.* **6**, 838-849.
- Miller, T., Krogan, N. J., Dover, J., Erdjument-Bromage, H., Tempst, P., Johnston, M., Greenblatt, J. F. and Shilatifard, A. (2001). COMPASS: a complex of proteins associated with a trithorax-related SET domain protein. *Proc. Natl. Acad. Sci. USA* **98**, 12902-12907.
- Mo, R., Rao, S. M. and Zhu, Y.-J. (2006). Identification of the MLL2 complex as a coactivator for estrogen receptor alpha. *J. Biol. Chem.* **281**, 15714-15720.
- Mohan, M., Herz, H. M., Smith, E. R., Zhang, Y., Jackson, J., Washburn, M. P., Florens, L., Eissenberg, J. C. and Shilatifard, A. (2011). The COMPASS family of H3K4 methylases in *Drosophila*. *Mol. Cell Biol.* **31**, 4310-4318.
- Morin, R. D., Mendez-Lago, M., Mungall, A. J., Goya, R., Mungall, K. L., Corbett, R. D., Johnson, N. A., Severson, T. M., Chiu, R., Field, M. et al. (2011). Frequent mutation of histone-modifying genes in non-Hodgkin lymphoma. *Nature* **476**, 298-303.
- Musselman, C. A. and Kutateladze, T. G. (2011). Handpicking epigenetic marks with PHD fingers. *Nucleic Acids Res.* **39**, 9061-9071.
- Nagy, P. L., Griesenbeck, J., Kornberg, R. D. and Cleary, M. L. (2002). A trithorax-group complex purified from *Saccharomyces cerevisiae* is required for methylation of histone H3. *Proc. Natl. Acad. Sci. USA* **99**, 90-94.
- Ng, S. B., Bigam, A. W., Buckingham, K. J., Hannibal, M. C., McMillin, M. J., Gildersleeve, H. I., Beck, A. E., Tabor, H. K., Cooper, G. M., Mefford, H. C. et al. (2010). Exome sequencing identifies MLL2 mutations as a cause of Kabuki syndrome. *Nat. Genet.* **42**, 790-793.
- Park, S., Osmers, U., Raman, G., Schwantes, R. H., Diaz, M. O. and Bushweller, J. H. (2010). The PHD3 domain of MLL acts as a CYP33-regulated switch between MLL-mediated activation and repression. *Biochemistry* **49**, 6576-6586.
- Parsons, D. W., Li, M., Zhang, X., Jones, S., Leary, R. J., Lin, J. C.-H., Boca, S. M., Carter, H., Samayoa, J., Bettegowda, C. et al. (2011). The genetic landscape of the childhood cancer medulloblastoma. *Science* **331**, 435-439.
- Paulussen, A. D. C., Stegmann, A. P. A., Blok, M. J., Tserpelis, D., Posma-Velter, C., Detisch, Y., Smeets, E. E. J. G. L., Wagemans, A., Schrandt, J. J.

- P., van den Boogaard, M.-J. H. et al. (2011). MLL2 mutation spectrum in 45 patients with Kabuki syndrome. *Hum. Mutat.* **32**, E2018-E2025.
- Pena, P. V., Davrazou, F., Shi, X., Walter, K. L., Verkhusha, V. V., Gozani, O., Zhao, R. and Kutateladze, T. G. (2006). Molecular mechanism of histone H3K4me3 recognition by plant homeodomain of ING2. *Nature* **442**, 100-103.
- Pospisilik, J. A., Schramek, D., Schnidar, H., Cronin, S. J. F., Nehme, N. T., Zhang, X., Knauf, C., Cani, P. D., Aumayr, K., Todoric, J. et al. (2010). *Drosophila* genome-wide obesity screen reveals hedgehog as a determinant of brown versus white adipose cell fate. *Cell* **140**, 148-160.
- Prasad, R., Zhadanov, A. B., Sedkov, Y., Bullrich, F., Druck, T., Rallapalli, R., Yano, T., Alder, H., Croce, C. M., Huebner, K. et al. (1997). Structure and expression pattern of human ALR, a novel gene with strong homology to ALL-1 involved in acute leukemia and to *Drosophila* trithorax. *Oncogene* **15**, 549-560.
- Riddiford, L. M. (1993). Hormones and *Drosophila* development. In *The Development of Drosophila melanogaster* (ed. M. Bate and A. Martinez-Arias), pp. 899-939. Cold Spring Harbor, NY: Cold Spring Harbor Laboratory Press.
- Ruault, M., Brun, M. E., Ventura, M., Roizes, G. and De Sario, A. (2002). MLL3, a new human member of the TRX/MLL gene family, maps to 7q36, a chromosome region frequently deleted in myeloid leukaemia. *Gene* **284**, 73-81.
- Ruthenburg, A. J., Allis, C. D. and Wysocka, J. (2007). Methylation of lysine 4 on histone H3: intricacy of writing and reading a single epigenetic mark. *Mol. Cell* **25**, 15-30.
- Sanchez, R. and Zhou, M. M. (2011). The PHD finger: a versatile epigenome reader. *Trends Biochem. Sci.* **36**, 364-372.
- Schuettengruber, B., Chourrout, D., Vervoort, M., Leblanc, B. and Cavalli, G. (2007). Genome regulation by polycomb and trithorax proteins. *Cell* **128**, 735-745.
- Schuettengruber, B., Ganapathi, M., Leblanc, B., Portoso, M., Jaschek, R., Tolhuis, B., van Lohuizen, M., Tanay, A. and Cavalli, G. (2009). Functional anatomy of polycomb and trithorax chromatin landscapes in *Drosophila* embryos. *PLoS Biol.* **7**, e13.
- Schwartz, Y. B., Kahn, T. G., Stenberg, P., Ohno, K., Bourgon, R. and Pirrotta, V. (2010). Alternative epigenetic chromatin states of polycomb target genes. *PLoS Genet.* **6**, e1000805.
- Sedkov, Y., Benes, J. J., Berger, J. R., Riker, K. M., Tillib, S., Jones, R. S. and Mazo, A. (1999). Molecular genetic analysis of the *Drosophila* trithorax-related gene which encodes a novel SET domain protein. *Mech. Dev.* **82**, 171-179.
- Sedkov, Y., Cho, E., Petruk, S., Cherbas, L., Smith, S. T., Jones, R. S., Cherbas, P., Canaani, E., Jaynes, J. B. and Mazo, A. (2003). Methylation at lysine 4 of histone H3 in ecdysone-dependent development of *Drosophila*. *Nature* **426**, 78-83.
- Seroude, L., Brummel, T., Kapahi, P. and Benzer, S. (2002). Spatio-temporal analysis of gene expression during aging in *Drosophila melanogaster*. *Aging Cell* **1**, 47-56.
- Simon, J. A. and Lis, J. T. (1987). A germline transformation analysis reveals flexibility in the organization of heat shock consensus elements. *Nucleic Acids Res.* **15**, 2971-2988.
- Simon, J. A. and Tamkun, J. W. (2002). Programming off and on states in chromatin: mechanisms of Polycomb and trithorax group complexes. *Curr. Opin. Genet. Dev.* **12**, 210-218.
- Sonoda, J., Pei, L. and Evans, R. M. (2008). Nuclear receptors: decoding metabolic disease. *FEBS Lett.* **582**, 2-9.
- Stroschein-Stevenson, S. L., Foley, E., O'Farrell, P. H. and Johnson, A. D. (2006). Identification of *Drosophila* gene products required for phagocytosis of *Candida albicans*. *PLoS Biol.* **4**, e4.
- Talbot, W. S., Swyryd, E. A. and Hogness, D. S. (1993). *Drosophila* tissues with different metamorphic responses to ecdysone express different ecdysone receptor isoforms. *Cell* **73**, 1323-1337.
- Vicent, G. P., Nacht, A. S., Font-Mateu, J., Castellano, G., Gaveglia, L., Ballare, C. and Beato, M. (2011). Four enzymes cooperate to displace histone H1 during the first minute of hormonal gene activation. *Genes Dev.* **25**, 845-862.
- Wang, W., Yu, H. and Long, M. (2004). Duplication-degeneration as a mechanism of gene fission and the origin of new genes in *Drosophila* species. *Nat. Genet.* **36**, 523-527.
- Wang, Z., Song, J., Milne, T. A., Wang, G. G., Li, H., Allis, C. D. and Patel, D. J. (2010). Pro isomerization in MLL1 PHD3-bromo cassette connects H3K4me readout to Cyp33 and HDAC-mediated repression. *Cell* **141**, 1183-1194.
- Wright, L. G., Chen, T., Thummel, C. S. and Guild, G. M. (1996). Molecular characterization of the 71E late puff in *Drosophila melanogaster* reveals a family of novel genes. *J. Mol. Biol.* **255**, 387-400.
- Yap, K. L. and Zhou, M. M. (2010). Keeping it in the family: diverse histone recognition by conserved structural folds. *Crit. Rev. Biochem. Mol. Biol.* **45**, 488-505.
- Yi, C. H., Sogah, D. K., Boyce, M., Degterev, A., Christofferson, D. E. and Yuan, J. (2007). A genome-wide RNAi screen reveals multiple regulators of caspase activation. *J. Cell Biol.* **179**, 619-626.
- Zraly, C. B., Feng, Y. and Dingwall, A. K. (2002). Genetic and molecular analysis of region 88E9;88F2 in *Drosophila melanogaster*, including the *ear* gene related to human factors involved in lineage-specific leukemias. *Genetics* **160**, 1051-1065.
- Zraly, C. B., Marendra, D. R., Nanchal, R., Cavalli, G., Muchardt, C. and Dingwall, A. K. (2003). SNR1 is an essential subunit in a subset of *Drosophila* Brm complexes, targeting specific functions during development. *Dev. Biol.* **253**, 291-308.
- Zraly, C. B., Marendra, D. R. and Dingwall, A. K. (2004). SNR1 (INI1/SNF5) mediates important cell growth functions of the *Drosophila* Brahma (SWI/SNF) chromatin remodeling complex. *Genetics* **168**, 199-214.
- Zraly, C. B., Middleton, F. A. and Dingwall, A. K. (2006). Hormone-response genes are direct in vivo regulatory targets of Brahma (SWI/SNF) complex function. *J. Biol. Chem.* **281**, 35305-35315.
